# Supplementary material for: Protocol investigating the clinical utility of an objective measure of attention, impulsivity and activity (QbTest) for optimising medication management in children and young people with ADHD ‘QbTest Utility for Optimising Treatment in ADHD’ (QUOTA): a feasibility randomised controlled trial
Source: PubMed Central journal article supplement (PMC5829926; doi:10.1136/bmjopen-2017-021104), 2018-02-15
Supplement: bmjopen-2017-021104supp001.pdf [file bmjopen-2017-021104supp001.pdf]

**Study ID:** IRAS 219538 **Participant Identification Number:**

**Name of participant (child):**

---

**CONSENT FORM**

---

Title of Project: **QbTest Utility for Optimising Treatment in ADHD (QUOTA)**

Name of Researcher: **CI: Dr Maddie Groom.**

Please initial all boxes

1. I confirm that I have read and understand the information sheet dated 10th Oct 2017 version 1.1 for the above study. I have had the opportunity to consider the information, ask questions and have had these answered satisfactorily.
  
2. I understand that my/my child's participation is voluntary and that I am free to withdraw at any time without giving any reason, without my/my child's medical care or legal rights being affected.
  
3. I understand that relevant sections of my child's medical notes and data collected during the study, may be looked at by individuals from the University of Nottingham, from regulatory authorities or from the NHS Trust, where it is relevant to my taking part in this research. I give permission for these individuals to have access to my child's records.
  
4. I agree to my child's teacher and head teacher to be contacted and be asked to complete questionnaires about their behaviour at school and provide a Provision Map if available.
  
5. I understand if I/my child takes part in any research interviews, they will be recorded and that anonymous direct quotes from the interviews may be used in study reports.
  
6. I agree to take part in the above study.

\_\_\_\_\_  
Name of parent/care giver                      Date                      Signature

\_\_\_\_\_  
Name of person taking consent                      Date                      Signature

|                                   |               |                    |
|-----------------------------------|---------------|--------------------|
| <u>OPTIONAL: for child assent</u> |               |                    |
| _____<br>Name of child            | _____<br>Date | _____<br>Signature |
